# Supplementary material for: Coffee Consumption and Blood Pressure: Results of the Second Wave of the Cognition of Older People, Education, Recreational Activities, Nutrition, Comorbidities, and Functional Capacity Studies (COPERNICUS)
Source: MDPI journal article supplement (doi:10.3390/nu13103372), 2021-09-25
Supplement: s1 [file s1]

**Table S1. Mixed linear model predicting systolic blood pressure changes.**

| Variable                                          | Estimate | -95% CI | 95% CI | T-statistic | p-value |
|---------------------------------------------------|----------|---------|--------|-------------|---------|
| Coffee everyday vs never to a few times per month | 8.32     | 1.18    | 15.91  | 2.27        | 0.02    |
| Coffee everyday vs once to a few times per week   | 5.15     | -3.80   | 14.13  | 1.15        | 0.25    |
| Age [years]                                       | -0.42    | -0.78   | -0.03  | -2.27       | 0.02    |
| Sex [male]                                        | -0.28    | -7.62   | 7.41   | -0.07       | 0.94    |
| Current smoker [yes]                              | 2.38     | -2.86   | 7.99   | 0.87        | 0.39    |
| Muscle mass [kg]                                  | -0.22    | -0.61   | 0.15   | -1.15       | 0.25    |
| Δ HR in supine [bpm]                              | -0.28    | -0.53   | -0.02  | -2.13       | 0.03    |
| Anti-HT drugs no to yes vs no to no [presence]    | -4.43    | -10.06  | 1.14   | -1.55       | 0.12    |
| Anti-HT drugs yes to no vs no to no [presence]    | -5.70    | -15.66  | 4.14   | -1.15       | 0.25    |
| Anti-HT drugs yes to yes vs no to no [presence]   | -6.22    | -11.40  | -1.11  | -2.34       | 0.02    |

**Table S2. Mixed linear model predicting diastolic blood pressure changes.**

| Variable                                          | Estimate | -95% CI | 95% CI | T-statistic | p-value |
|---------------------------------------------------|----------|---------|--------|-------------|---------|
| Coffee everyday vs never to a few times per month | 4.02     | -0.51   | 8.49   | 1.74        | 0.08    |
| Coffee everyday vs once to a few times per week   | 2.48     | -3.13   | 7.93   | 0.88        | 0.38    |
| Age [years]                                       | 0.14     | -0.08   | 0.37   | 1.21        | 0.23    |
| Sex [male]                                        | -1.19    | -6.05   | 3.48   | -0.48       | 0.63    |
| Current smoker [yes]                              | 2.14     | -1.28   | 5.65   | 1.23        | 0.22    |
| Muscle mass [kg]                                  | -0.19    | -0.44   | 0.06   | -1.54       | 0.13    |
| Δ HR in supine [bpm]                              | -0.20    | -0.36   | -0.02  | -2.25       | 0.03    |
| Anti-HT drugs no to yes vs no to no [presence]    | -2.49    | -6.11   | 1.06   | -1.37       | 0.17    |
| Anti-HT drugs yes to no vs no to no [presence]    | -3.61    | -9.60   | 2.71   | -1.15       | 0.25    |
| Anti-HT drugs yes to yes vs no to no [presence]   | -2.03    | -5.36   | 1.24   | -1.20       | 0.23    |

**Table S3. Mixed linear model predicting mean blood pressure changes.**

| Variable                                          | Estimate | -95% CI | 95% CI | T-statistic | p-value |
|---------------------------------------------------|----------|---------|--------|-------------|---------|
| Coffee everyday vs never to a few times per month | 4.02     | -0.51   | 8.49   | 1.74        | 0.08    |
| Coffee everyday vs once to a few times per week   | 2.48     | -3.13   | 7.93   | 0.88        | 0.38    |
| Age [years]                                       | 0.14     | -0.08   | 0.37   | 1.21        | 0.23    |
| Sex [male]                                        | -1.19    | -6.05   | 3.48   | -0.48       | 0.63    |
| Current smoker [yes]                              | 2.14     | -1.28   | 5.65   | 1.23        | 0.22    |
| Muscle mass [kg]                                  | -0.19    | -0.44   | 0.06   | -1.54       | 0.13    |
| Δ HR in supine [bpm]                              | -0.20    | -0.36   | -0.02  | -2.25       | 0.03    |
| Anti-HT drugs no to yes vs no to no [presence]    | -2.49    | -6.11   | 1.06   | -1.37       | 0.17    |
| Anti-HT drugs yes to no vs no to no [presence]    | -3.61    | -9.60   | 2.71   | -1.15       | 0.25    |
| Anti-HT drugs yes to yes vs no to no [presence]   | -2.03    | -5.36   | 1.24   | -1.20       | 0.23    |

**Table S4. Mixed linear model predicting pulse pressure changes.**

| Variable                                          | Estimate | -95% CI | 95% CI | T-statistic | <i>p</i> -value |
|---------------------------------------------------|----------|---------|--------|-------------|-----------------|
| Coffee everyday vs never to a few times per month | 4.00     | -1.48   | 8.99   | 1.52        | 0.13            |
| Coffee everyday vs once to a few times per week   | 2.55     | -4.18   | 9.26   | 0.79        | 0.43            |
| Age [years]                                       | -0.50    | -0.78   | -0.22  | -3.76       | 0.0002          |
| Sex [male]                                        | 1.33     | -4.27   | 6.74   | 0.48        | 0.64            |
| Current smoker [yes]                              | 0.33     | -3.53   | 4.33   | 0.17        | 0.87            |
| Muscle mass [kg]                                  | -0.07    | -0.36   | 0.21   | -0.51       | 0.61            |
| Δ HR in supine [bpm]                              | -0.09    | -0.28   | 0.12   | -0.85       | 0.40            |
| Anti-HT drugs no to yes vs no to no [presence]    | -2.69    | -6.77   | 1.26   | -1.30       | 0.20            |
| Anti-HT drugs yes to no vs no to no [presence]    | -2.90    | -9.82   | 4.34   | -0.81       | 0.42            |
| Anti-HT drugs yes to yes vs no to no [presence]   | -4.79    | -8.63   | -0.93  | -2.49       | 0.01            |
